# Supplementary material for: Machine Learning: How Much Does It Tell about Protein Folding Rates?
Source: PubMed Central journal article supplement (PMC4659572; doi:10.1371/journal.pone.0143166), 2015-11-25
Supplement: pone.0143166.s001.pdf [file pone.0143166.s001.pdf]

**Supplementary Table 1.** The list of proteins used in the paper.

|    | name                                                     | PDB   | length | $\ln(k_f)$ | kinetic order | $\Omega$ | amino acid composition |   |   |    |   |   |   |   |    |    |   |   |   |   |   |   |   |   |   |   |
|----|----------------------------------------------------------|-------|--------|------------|---------------|----------|------------------------|---|---|----|---|---|---|---|----|----|---|---|---|---|---|---|---|---|---|---|
|    |                                                          |       |        |            |               |          | A                      | C | D | E  | F | G | H | I | K  | L  | M | N | P | Q | R | S | T | V | W | Y |
| 1  | Trp-cage protein                                         | 1L2Y  | 20     | 12.5       | two           | -0.14    | 0                      | 0 | 1 | 0  | 0 | 3 | 0 | 1 | 1  | 2  | 0 | 1 | 4 | 1 | 1 | 3 | 0 | 0 | 1 | 1 |
| 2  | Alanine-based peptide                                    | alpha | 21     | 15.5       | two           | 2.43     | 18                     | 0 | 0 | 0  | 0 | 0 | 0 | 0 | 0  | 0  | 0 | 0 | 0 | 0 | 3 | 0 | 0 | 0 | 0 | 0 |
| 3  | Villin headpeace subdomain                               | 1VII  | 36     | 9.4        | two           | 0.83     | 3                      | 0 | 2 | 2  | 4 | 2 | 0 | 0 | 5  | 5  | 2 | 2 | 1 | 2 | 1 | 2 | 1 | 1 | 1 | 0 |
| 4  | Peripheral subunit-binding domain                        | 2PDD  | 41     | 9.8        | two           | 0.23     | 5                      | 0 | 3 | 2  | 1 | 6 | 0 | 2 | 4  | 3  | 1 | 1 | 1 | 1 | 4 | 1 | 1 | 4 | 0 | 1 |
| 5  | GA module of albumin binding domain                      | 1PRB  | 47     | 13.8       | two           | 0.93     | 9                      | 0 | 2 | 5  | 2 | 1 | 1 | 5 | 6  | 4  | 0 | 5 | 0 | 0 | 0 | 1 | 2 | 3 | 0 | 1 |
| 6  | B-domain of staphylococcal proteinA                      | 1BDD  | 58     | 11.7       | two           | 1.65     | 7                      | 0 | 4 | 5  | 3 | 1 | 1 | 2 | 6  | 7  | 0 | 8 | 3 | 6 | 1 | 3 | 0 | 0 | 0 | 1 |
| 7  | Engrailed homeodomain                                    | 1ENH  | 61     | 10.5       | multi         | 0.95     | 4                      | 0 | 0 | 7  | 3 | 2 | 0 | 3 | 7  | 6  | 0 | 4 | 1 | 5 | 9 | 5 | 3 | 0 | 1 | 1 |
| 8  | TRF1 Myb domain                                          | 1BA5  | 53     | 5.9        | two           | 0.49     | 1                      | 0 | 2 | 3  | 1 | 3 | 1 | 1 | 8  | 6  | 2 | 4 | 0 | 1 | 7 | 3 | 2 | 2 | 4 | 2 |
| 9  | RAP1 Myb domain                                          | 1FEX  | 59     | 8.2        | two           | 0.00     | 6                      | 0 | 4 | 2  | 1 | 3 | 2 | 2 | 5  | 6  | 1 | 2 | 1 | 2 | 4 | 7 | 4 | 3 | 2 | 2 |
| 10 | c-Myb-transforming protein                               | 1GV2  | 55     | 8.7        | two           | 0.90     | 4                      | 0 | 2 | 7  | 0 | 3 | 2 | 4 | 4  | 4  | 1 | 4 | 1 | 3 | 6 | 1 | 3 | 1 | 3 | 2 |
| 11 | Phage 434 cro protein                                    | 2CRO  | 71     | 3.7        | multi         | 1.40     | 8                      | 1 | 1 | 4  | 2 | 4 | 0 | 4 | 8  | 8  | 3 | 1 | 2 | 6 | 6 | 2 | 6 | 3 | 1 | 1 |
| 12 | $\alpha$ 3D                                              | 2A3D  | 73     | 12.2       | two           | 2.46     | 15                     | 0 | 1 | 11 | 3 | 5 | 1 | 3 | 6  | 7  | 1 | 2 | 1 | 4 | 5 | 3 | 1 | 1 | 1 | 2 |
| 13 | l-repressor                                              | 1LMB  | 81     | 10.4       | two           | 1.48     | 10                     | 0 | 2 | 9  | 2 | 6 | 0 | 5 | 7  | 10 | 2 | 5 | 2 | 4 | 3 | 6 | 1 | 4 | 1 | 2 |
| 14 | Acyl-coenzyme A binding protein                          | 1NTI  | 86     | 7.0        | two           | 0.84     | 9                      | 0 | 7 | 10 | 3 | 5 | 2 | 4 | 15 | 5  | 3 | 2 | 2 | 2 | 1 | 3 | 4 | 3 | 2 | 4 |
| 15 | Hypothetical protein encoded by the Ybj gene from E.coli | 1JYG  | 89     | 9.1        | two           | 0.32     | 2                      | 1 | 7 | 8  | 1 | 9 | 7 | 3 | 10 | 3  | 3 | 3 | 1 | 6 | 5 | 5 | 3 | 5 | 4 | 3 |

|    |                                            |      |     |      |       |       |    |   |    |    |    |    |    |    |    |    |   |    |    |   |    |    |    |    |   |   |
|----|--------------------------------------------|------|-----|------|-------|-------|----|---|----|----|----|----|----|----|----|----|---|----|----|---|----|----|----|----|---|---|
| 16 | Colicin E9 immunity protein                | 1IMQ | 93  | 7.3  | two   | -0.11 | 4  | 1 | 6  | 11 | 3  | 6  | 9  | 4  | 6  | 6  | 2 | 3  | 3  | 3 | 1  | 9  | 7  | 5  | 1 | 3 |
| 17 | Colicin E7 immunity protein                | 1AYI | 94  | 7.2  | two   | -0.14 | 5  | 0 | 9  | 12 | 3  | 5  | 8  | 6  | 8  | 7  | 1 | 4  | 4  | 2 | 2  | 4  | 4  | 6  | 1 | 3 |
| 18 | Cytochrome b562                            | 256B | 106 | 12.3 | two   | 2.24  | 17 | 0 | 12 | 8  | 2  | 3  | 2  | 3  | 13 | 10 | 3 | 6  | 4  | 6 | 4  | 2  | 5  | 4  | 0 | 2 |
| 19 | 15th domain of brain $\alpha$ -spectrin    | 1U5P | 118 | 11.0 | two   | 1.02  | 13 | 0 | 12 | 10 | 5  | 3  | 2  | 2  | 13 | 15 | 1 | 6  | 0  | 8 | 3  | 14 | 3  | 5  | 2 | 1 |
| 20 | 16th domain of brain $\alpha$ -spectrin    | 1U5P | 118 | 4.8  | two   | 0.80  | 9  | 0 | 10 | 11 | 3  | 7  | 4  | 6  | 13 | 11 | 2 | 4  | 1  | 7 | 11 | 8  | 5  | 4  | 1 | 1 |
| 21 | 17th domain of brain $\alpha$ -spectrin    | 1CUN | 118 | 3.4  | two   | 1.95  | 12 | 1 | 7  | 16 | 4  | 6  | 5  | 5  | 11 | 10 | 2 | 7  | 0  | 8 | 4  | 3  | 5  | 8  | 2 | 2 |
| 22 | Tumour suppressor protein p16              | 2A5E | 148 | 3.5  | multi | 3.65  | 27 | 1 | 11 | 10 | 1  | 13 | 5  | 3  | 0  | 17 | 4 | 4  | 10 | 1 | 17 | 5  | 5  | 10 | 2 | 2 |
| 23 | Apomyoglobin                               | 1A6N | 151 | 1.1  | multi | 1.10  | 17 | 0 | 7  | 14 | 6  | 10 | 12 | 9  | 19 | 18 | 2 | 1  | 4  | 4 | 4  | 6  | 5  | 8  | 2 | 3 |
| 24 | Lyme disease variable surface antigen      | 1L8W | 338 | 2.0  | two   | 2.57  | 60 | 0 | 23 | 26 | 10 | 42 | 0  | 15 | 43 | 17 | 2 | 12 | 8  | 6 | 3  | 27 | 17 | 25 | 0 | 2 |
| 25 | C-terminal $\beta$ -hairpin of protein GB1 | 1PGB | 16  | 12.0 | two   | -0.42 | 1  | 0 | 2  | 2  | 1  | 1  | 0  | 0  | 1  | 0  | 0 | 0  | 0  | 0 | 0  | 0  | 5  | 1  | 1 | 1 |
| 26 | Pin WW domain                              | 1PIN | 34  | 9.5  | two   | 0.15  | 1  | 0 | 0  | 2  | 1  | 3  | 1  | 1  | 2  | 1  | 1 | 2  | 3  | 1 | 4  | 5  | 1  | 1  | 2 | 2 |
| 27 | Prototype WW domain                        | 1E0M | 38  | 8.9  | two   | -0.35 | 0  | 0 | 2  | 1  | 0  | 4  | 2  | 0  | 3  | 1  | 2 | 3  | 3  | 0 | 1  | 4  | 6  | 0  | 2 | 4 |
| 28 | Formin-binding protein                     | 1E0L | 37  | 10.6 | two   | -0.03 | 4  | 0 | 1  | 5  | 0  | 2  | 0  | 0  | 4  | 2  | 0 | 2  | 1  | 1 | 1  | 2  | 6  | 1  | 1 | 4 |
| 29 | Yes kinase-associated protein              | 1JMQ | 40  | 8.4  | two   | 0.02  | 2  | 0 | 4  | 2  | 2  | 2  | 1  | 2  | 2  | 2  | 1 | 1  | 4  | 3 | 2  | 2  | 4  | 1  | 2 | 1 |
| 30 | Src SH3 domain                             | 1RLQ | 62  | 4.4  | two   | -0.69 | 4  | 0 | 4  | 4  | 2  | 5  | 1  | 2  | 2  | 6  | 0 | 3  | 2  | 2 | 2  | 6  | 8  | 3  | 2 | 4 |
| 31 | $\alpha$ -spectrin SH3 domain              | 1SHG | 62  | 1.1  | two   | -0.14 | 3  | 0 | 6  | 5  | 1  | 3  | 0  | 1  | 8  | 7  | 2 | 3  | 2  | 2 | 2  | 2  | 4  | 6  | 2 | 3 |
| 32 | Cold shock protein B                       | 1C9O | 66  | 7.2  | two   | 0.14  | 3  | 0 | 1  | 8  | 6  | 10 | 1  | 3  | 5  | 2  | 1 | 4  | 1  | 5 | 2  | 2  | 2  | 8  | 1 | 1 |
| 33 | Cold shock protein                         | 1G6P | 66  | 6.3  | two   | -0.25 | 3  | 0 | 3  | 8  | 5  | 9  | 2  | 3  | 10 | 1  | 2 | 0  | 1  | 3 | 1  | 2  | 2  | 8  | 2 | 1 |

| B  |                                                                          |      |    |      |       |       |    |   |    |    |   |    |   |   |    |    |   |   |   |   |   |    |    |    |   |   |
|----|--------------------------------------------------------------------------|------|----|------|-------|-------|----|---|----|----|---|----|---|---|----|----|---|---|---|---|---|----|----|----|---|---|
| 34 | Cold shock protein B                                                     | 1CSP | 67 | 6.5  | two   | 0.45  | 5  | 0 | 2  | 10 | 7 | 9  | 1 | 3 | 5  | 2  | 1 | 3 | 1 | 4 | 1 | 3  | 2  | 7  | 1 | 0 |
| 35 | Actin binding protein ABP1 SH3 domain                                    | 1JO8 | 68 | 2.5  | two   | 0.43  | 5  | 0 | 8  | 8  | 3 | 4  | 6 | 3 | 3  | 6  | 1 | 5 | 2 | 0 | 0 | 3  | 2  | 3  | 3 | 3 |
| 36 | Photosystem I accessory protein E                                        | 1PSF | 69 | 3.2  | two   | -0.69 | 4  | 0 | 2  | 5  | 3 | 9  | 1 | 6 | 5  | 3  | 0 | 6 | 1 | 0 | 3 | 6  | 2  | 8  | 1 | 4 |
| 37 | Cold shock protein A                                                     | 1MJC | 70 | 5.3  | two   | -0.41 | 5  | 0 | 6  | 2  | 6 | 10 | 1 | 4 | 7  | 2  | 2 | 3 | 2 | 2 | 0 | 7  | 4  | 5  | 1 | 1 |
| 38 | Fyn SH3 domain                                                           | 1AVZ | 78 | 4.9  | two   | -0.25 | 4  | 0 | 4  | 7  | 3 | 7  | 8 | 2 | 2  | 6  | 2 | 2 | 3 | 1 | 3 | 10 | 5  | 3  | 2 | 4 |
| 39 | SH3-like domain of virulence protein internalin B                        | 1M9S | 85 | 4.0  | two   | 0.64  | 5  | 1 | 3  | 6  | 0 | 6  | 7 | 3 | 8  | 10 | 1 | 6 | 1 | 1 | 8 | 3  | 7  | 3  | 2 | 4 |
| 40 | Immunoglobulin domain of cardiac titin                                   | 1TIT | 89 | 3.6  | multi | 1.05  | 7  | 2 | 3  | 11 | 3 | 7  | 4 | 6 | 8  | 10 | 1 | 3 | 4 | 4 | 0 | 4  | 3  | 7  | 1 | 1 |
| 41 | Ninth fibronectin type III module of fibronectin                         | 1FNF | 90 | -0.9 | two   | -1.00 | 4  | 0 | 4  | 5  | 3 | 7  | 5 | 8 | 0  | 6  | 0 | 4 | 7 | 2 | 8 | 9  | 10 | 5  | 1 | 2 |
| 42 | Third fibronectin type III repeat of tenascin                            | 1TEN | 92 | 1.1  | two   | -1.26 | 4  | 0 | 10 | 8  | 2 | 6  | 0 | 8 | 5  | 7  | 1 | 3 | 5 | 2 | 4 | 7  | 12 | 4  | 1 | 3 |
| 43 | SH3 domain of the p85 $\alpha$ subunit of phosphatidylinositol 3'-kinase | 1PNJ | 90 | -1.0 | two   | -0.40 | 4  | 0 | 6  | 10 | 2 | 12 | 1 | 5 | 6  | 7  | 1 | 4 | 3 | 2 | 4 | 7  | 4  | 3  | 2 | 7 |
| 44 | 18th module of muscle protein twitchin                                   | 1WIT | 93 | 0.4  | two   | -0.12 | 11 | 0 | 6  | 6  | 5 | 6  | 1 | 7 | 10 | 8  | 0 | 3 | 5 | 1 | 2 | 7  | 7  | 6  | 1 | 1 |
| 45 | Tenth fibronectin type III domain of                                     | 1FNF | 94 | 5.5  | multi | -2.05 | 7  | 0 | 5  | 4  | 1 | 8  | 0 | 7 | 3  | 4  | 0 | 2 | 8 | 1 | 5 | 10 | 12 | 10 | 1 | 6 |

fibronectin

|    |                                                            |      |     |      |       |       |    |   |    |    |    |    |   |    |    |    |   |    |    |   |    |   |    |    |   |   |
|----|------------------------------------------------------------|------|-----|------|-------|-------|----|---|----|----|----|----|---|----|----|----|---|----|----|---|----|---|----|----|---|---|
| 46 | C-terminal domain of the cell-surface receptor protein CD2 | 1CDC | 98  | 1.8  | multi | -0.28 | 5  | 0 | 9  | 4  | 4  | 10 | 1 | 6  | 7  | 10 | 2 | 7  | 2  | 1 | 7  | 6 | 8  | 5  | 2 | 2 |
| 47 | Ileal lipid binding protein                                | 1EAL | 127 | 1.3  | multi | -0.09 | 4  | 1 | 6  | 14 | 8  | 13 | 1 | 7  | 13 | 3  | 5 | 6  | 2  | 5 | 5  | 8 | 9  | 11 | 1 | 5 |
| 48 | Intestinal fatty acid binding protein                      | 1IFC | 131 | 3.4  | multi | -0.01 | 6  | 0 | 7  | 14 | 8  | 12 | 1 | 7  | 15 | 9  | 3 | 10 | 0  | 2 | 6  | 4 | 10 | 11 | 2 | 4 |
| 49 | Cellular retinol binding protein II                        | 1OPA | 134 | 1.4  | multi | 0.19  | 3  | 3 | 11 | 11 | 7  | 11 | 1 | 4  | 15 | 9  | 2 | 9  | 0  | 7 | 6  | 2 | 14 | 11 | 4 | 3 |
| 50 | Cellular retinoic acid binding protein I                   | 1CBI | 137 | -3.2 | multi | 1.21  | 9  | 3 | 8  | 14 | 6  | 9  | 2 | 6  | 9  | 10 | 3 | 7  | 4  | 3 | 9  | 5 | 14 | 10 | 3 | 3 |
| 51 | Chemotaxis protein CheW                                    | 1K0S | 151 | 7.4  | two   | -1.63 | 6  | 0 | 13 | 13 | 7  | 9  | 1 | 18 | 15 | 15 | 3 | 5  | 3  | 3 | 7  | 7 | 7  | 18 | 0 | 1 |
| 52 | Cyclophilin A                                              | 1LOP | 164 | 6.6  | two   | 0.97  | 10 | 2 | 11 | 11 | 12 | 16 | 5 | 10 | 11 | 5  | 6 | 12 | 5  | 6 | 5  | 6 | 12 | 15 | 1 | 3 |
| 53 | Barstar                                                    | 1BRS | 89  | 3.4  | multi | 0.43  | 8  | 0 | 4  | 11 | 2  | 5  | 1 | 6  | 6  | 12 | 0 | 3  | 2  | 6 | 3  | 5 | 4  | 5  | 3 | 3 |
| 54 | Chemotactic protein                                        | 1DJM | 129 | 1.0  | multi | 2.43  | 16 | 0 | 8  | 11 | 6  | 10 | 0 | 6  | 11 | 15 | 7 | 8  | 3  | 2 | 4  | 4 | 5  | 10 | 1 | 2 |
| 55 | C-terminally truncated fragment of GroEL apical domain     | 1AON | 155 | -1.5 | multi | 1.01  | 17 | 0 | 8  | 16 | 4  | 15 | 0 | 14 | 11 | 15 | 5 | 4  | 6  | 4 | 7  | 4 | 10 | 13 | 0 | 2 |
| 56 | Ribonuclease HI                                            | 1F21 | 155 | 0.1  | multi | 1.80  | 17 | 0 | 7  | 12 | 2  | 14 | 5 | 7  | 11 | 12 | 4 | 7  | 5  | 8 | 10 | 4 | 10 | 9  | 6 | 5 |
| 57 | Dihydrofolate reductase                                    | 4KJK | 159 | -3.2 | multi | 1.50  | 13 | 2 | 13 | 12 | 6  | 10 | 5 | 12 | 6  | 11 | 5 | 6  | 10 | 4 | 9  | 9 | 6  | 11 | 5 | 4 |
| 58 | N-terminal domain of phosphoglycerate kinase               | 1PHP | 174 | 2.3  | multi | 2.37  | 23 | 1 | 12 | 17 | 6  | 12 | 5 | 7  | 12 | 18 | 3 | 7  | 7  | 1 | 14 | 2 | 6  | 17 | 0 | 4 |
| 59 | C-terminal domain of phosphoglycerate                      | 1PHP | 220 | -3.5 | multi | 0.78  | 26 | 0 | 19 | 16 | 9  | 23 | 3 | 14 | 20 | 20 | 6 | 6  | 8  | 1 | 6  | 9 | 7  | 21 | 1 | 5 |

kinase

|    |                                                        |      |     |      |       |       |    |   |    |    |    |    |    |    |    |    |    |    |    |    |    |    |    |    |   |    |
|----|--------------------------------------------------------|------|-----|------|-------|-------|----|---|----|----|----|----|----|----|----|----|----|----|----|----|----|----|----|----|---|----|
| 60 | Tryptophan synthase $\alpha$ subunit                   | 1QOP | 268 | -2.5 | multi | 4.65  | 40 | 3 | 13 | 17 | 12 | 19 | 4  | 20 | 13 | 27 | 5  | 9  | 19 | 12 | 11 | 11 | 9  | 17 | 0 | 7  |
| 61 | Tryptophan synthase $\beta$ 2 subunit                  | 2DH5 | 397 | -6.9 | multi | 5.95  | 41 | 5 | 17 | 30 | 13 | 43 | 14 | 23 | 18 | 39 | 15 | 14 | 18 | 16 | 18 | 18 | 23 | 19 | 1 | 12 |
| 62 | BBA5 mini-protein N-terminal domain                    | 1T8J | 23  | 11.8 | two   | -0.01 | 2  | 0 | 2  | 1  | 0  | 1  | 1  | 0  | 1  | 3  | 0  | 0  | 1  | 1  | 3  | 3  | 0  | 0  | 1 | 3  |
| 63 | from ribosomal protein L9                              | 1DIV | 56  | 6.6  | two   | 1.03  | 7  | 0 | 2  | 4  | 3  | 5  | 0  | 3  | 11 | 5  | 1  | 4  | 1  | 4  | 1  | 0  | 1  | 3  | 0 | 1  |
| 64 | B1 domain of streptococcal protein G                   | 3GB1 | 62  | 6.3  | two   | -0.31 | 6  | 0 | 5  | 5  | 2  | 4  | 6  | 1  | 6  | 3  | 1  | 3  | 0  | 1  | 0  | 0  | 11 | 4  | 1 | 3  |
| 65 | Sso7d protein, Y34W                                    | 1BNZ | 64  | 6.95 | two   | 0.01  | 3  | 0 | 3  | 7  | 2  | 7  | 0  | 3  | 14 | 3  | 3  | 0  | 1  | 2  | 2  | 3  | 3  | 5  | 2 | 1  |
| 66 | Chymotrypsin inhibitor 2                               | 2CI2 | 65  | 5.8  | two   | -0.43 | 3  | 0 | 4  | 6  | 1  | 3  | 0  | 6  | 6  | 6  | 2  | 1  | 4  | 3  | 4  | 1  | 3  | 10 | 1 | 1  |
| 67 | Ubiquitin                                              | 1UBQ | 76  | 7.3  | two   | -0.58 | 2  | 0 | 5  | 6  | 2  | 6  | 1  | 7  | 7  | 9  | 1  | 2  | 3  | 6  | 4  | 3  | 7  | 4  | 0 | 1  |
| 68 | Immunoglobulin light chain-binding domain of protein L | 1HZ5 | 72  | 4.1  | two   | 0.72  | 10 | 0 | 4  | 6  | 4  | 5  | 6  | 3  | 7  | 3  | 2  | 4  | 0  | 1  | 0  | 2  | 8  | 3  | 1 | 3  |
| 69 | Ras-binding domain of C-raf-1                          | 1RFA | 80  | 8.4  | two   | 1.74  | 5  | 3 | 5  | 4  | 3  | 5  | 3  | 2  | 6  | 11 | 3  | 5  | 2  | 3  | 6  | 3  | 3  | 7  | 1 | 0  |
| 70 | Activation domain of procarboxypeptidase A2            | 1O6X | 81  | 6.8  | two   | 0.01  | 4  | 0 | 3  | 9  | 4  | 3  | 2  | 5  | 3  | 8  | 2  | 3  | 4  | 8  | 2  | 5  | 4  | 10 | 1 | 1  |
| 71 | Histidine-containing phosphocarrier protein            | 1POH | 85  | 2.7  | two   | 0.34  | 9  | 0 | 1  | 9  | 4  | 6  | 2  | 3  | 7  | 8  | 2  | 2  | 2  | 6  | 1  | 6  | 10 | 7  | 0 | 0  |
| 72 | N-terminal domain of HypF                              | 1GXT | 91  | 4.4  | multi | 0.91  | 3  | 3 | 5  | 6  | 5  | 7  | 2  | 4  | 2  | 9  | 1  | 3  | 6  | 8  | 8  | 3  | 4  | 9  | 2 | 1  |

|    |                                                   |      |     |      |       |       |    |   |    |    |   |    |   |    |    |    |   |    |   |   |    |    |    |    |   |   |
|----|---------------------------------------------------|------|-----|------|-------|-------|----|---|----|----|---|----|---|----|----|----|---|----|---|---|----|----|----|----|---|---|
| 73 | C-terminal domain<br>from ribosomal<br>protein L9 | 1DIV | 92  | 3.3  | two   | 0.63  | 12 | 0 | 2  | 9  | 1 | 6  | 3 | 5  | 12 | 12 | 0 | 2  | 3 | 5 | 3  | 3  | 7  | 6  | 0 | 1 |
| 74 | Ribosomal protein<br>L23                          | 1N88 | 96  | 2.0  | two   | -0.02 | 11 | 0 | 2  | 6  | 3 | 7  | 2 | 5  | 16 | 7  | 1 | 2  | 4 | 2 | 5  | 1  | 6  | 11 | 1 | 4 |
| 75 | Common-type<br>acylphosphatase                    | 2VH7 | 98  | 0.8  | two   | -0.63 | 3  | 0 | 5  | 6  | 5 | 10 | 3 | 6  | 10 | 7  | 1 | 5  | 2 | 8 | 4  | 5  | 5  | 9  | 2 | 2 |
| 76 | Muscle<br>acylphosphatase                         | 1APS | 99  | -1.6 | two   | -1.22 | 2  | 1 | 4  | 6  | 4 | 9  | 0 | 4  | 9  | 3  | 2 | 5  | 2 | 4 | 6  | 14 | 7  | 11 | 2 | 4 |
| 77 | Ribosomal protein<br>S6                           | 1RIS | 101 | 6.1  | two   | 1.48  | 8  | 0 | 5  | 10 | 2 | 4  | 0 | 5  | 4  | 12 | 3 | 7  | 5 | 6 | 12 | 2  | 0  | 10 | 1 | 5 |
| 78 | Spliceosomal<br>protein U1A                       | 1AUD | 102 | 4.6  | two   | 0.58  | 7  | 0 | 5  | 4  | 6 | 4  | 2 | 10 | 11 | 7  | 5 | 5  | 4 | 4 | 6  | 8  | 5  | 5  | 1 | 3 |
| 79 | Barnase                                           | 1BNI | 110 | 2.6  | multi | -0.95 | 8  | 0 | 9  | 3  | 4 | 10 | 2 | 8  | 8  | 7  | 0 | 6  | 3 | 4 | 6  | 9  | 9  | 4  | 3 | 7 |
| 80 | FK506 binding<br>protein                          | 1FKF | 109 | 1.6  | two   | -0.09 | 5  | 1 | 6  | 6  | 5 | 15 | 3 | 5  | 8  | 7  | 4 | 1  | 7 | 5 | 6  | 6  | 7  | 9  | 1 | 2 |
| 81 | Src SH2 domain                                    | 1IS0 | 110 | 8.7  | two   | 0.53  | 6  | 3 | 4  | 7  | 5 | 8  | 3 | 3  | 8  | 11 | 0 | 5  | 4 | 5 | 8  | 10 | 8  | 5  | 1 | 6 |
| 82 | Cell-cycle<br>regulatory protein<br>p13suc1       | 1PUC | 113 | 4.2  | multi | 0.67  | 4  | 0 | 5  | 13 | 4 | 7  | 4 | 6  | 6  | 11 | 5 | 1  | 8 | 6 | 9  | 6  | 5  | 4  | 2 | 7 |
| 84 | T4 lysozyme                                       | 2I2L | 164 | 4.1  | multi | 1.65  | 17 | 0 | 10 | 8  | 5 | 10 | 1 | 11 | 13 | 16 | 5 | 12 | 3 | 5 | 13 | 6  | 11 | 9  | 3 | 6 |
| 85 | Sho1 SH3 domain                                   | 2VKN | 76  | 2.1  | two   | 0.73  | 7  | 0 | 7  | 8  | 1 | 4  | 7 | 7  | 3  | 4  | 2 | 3  | 3 | 3 | 4  | 3  | 1  | 2  | 2 | 5 |
| 86 | Ubiquitin related<br>modifier 1                   | 2PKO | 101 | 2.6  | two   | -1.49 | 1  | 0 | 13 | 7  | 4 | 10 | 3 | 14 | 6  | 7  | 3 | 5  | 3 | 1 | 2  | 6  | 6  | 8  | 1 | 1 |
| 87 | Hypothetical protein<br>Tm1083                    | 1J5U | 124 | 6.9  | two   | 0.22  | 6  | 0 | 8  | 21 | 5 | 6  | 2 | 10 | 13 | 12 | 2 | 4  | 3 | 0 | 7  | 3  | 9  | 6  | 3 | 4 |
| 88 | Villin 14T, N-<br>terminal domain of<br>villin    | 2VIK | 126 | 4.2  | multi | -0.42 | 6  | 1 | 4  | 9  | 4 | 14 | 3 | 6  | 10 | 7  | 4 | 4  | 3 | 8 | 4  | 10 | 9  | 9  | 2 | 9 |
| 89 | E3-binding domain<br>of BBL                       | 2WXC | 47  | 11.2 | two   | 0.67  | 7  | 0 | 3  | 3  | 0 | 5  | 1 | 2  | 3  | 6  | 0 | 3  | 1 | 1 | 4  | 3  | 2  | 2  | 1 | 0 |
| 90 | LysM domain                                       | 1E0G | 66  | 7.0  | two   | 0.14  | 4  | 0 | 6  | 0  | 1 | 4  | 1 | 3  | 5  | 5  | 2 | 8  | 2 | 2 | 5  | 9  | 3  | 4  | 1 | 1 |

|     |                                  |      |     |      |       |       |    |   |    |    |    |    |    |    |    |    |   |    |    |    |    |    |    |    |   |   |
|-----|----------------------------------|------|-----|------|-------|-------|----|---|----|----|----|----|----|----|----|----|---|----|----|----|----|----|----|----|---|---|
| 91  | POB                              | 1W4J | 51  | 12.3 | two   | 0.64  | 10 | 0 | 2  | 5  | 0  | 6  | 0  | 2  | 5  | 2  | 1 | 0  | 2  | 0  | 4  | 2  | 4  | 5  | 1 | 0 |
| 92  | Pit1 homeodomain                 | 1AU7 | 63  | 9.7  | multi | 1.37  | 4  | 1 | 1  | 9  | 2  | 1  | 2  | 3  | 7  | 3  | 2 | 3  | 1  | 2  | 11 | 4  | 2  | 4  | 1 | 0 |
| 93  | FF domain                        | 1UZC | 71  | 7.7  | multi | 1.34  | 9  | 0 | 1  | 7  | 2  | 1  | 0  | 2  | 13 | 4  | 2 | 4  | 3  | 5  | 2  | 5  | 4  | 2  | 2 | 3 |
| 94  | C-domain of spore coat protein S | 1PRS | 91  | -2.0 | two   | 0.10  | 5  | 0 | 6  | 4  | 5  | 7  | 6  | 4  | 4  | 6  | 1 | 8  | 6  | 5  | 4  | 7  | 5  | 5  | 0 | 3 |
| 95  | apocytochrome b5                 | 1HKO | 104 | 3.0  | two   | -0.96 | 5  | 0 | 7  | 14 | 3  | 6  | 5  | 8  | 9  | 8  | 0 | 3  | 3  | 2  | 3  | 10 | 9  | 4  | 1 | 4 |
| 96  | ACBP                             | 1ST7 | 86  | 8.5  | multi | 0.62  | 8  | 0 | 6  | 11 | 2  | 3  | 0  | 3  | 12 | 9  | 1 | 4  | 3  | 4  | 1  | 5  | 3  | 4  | 2 | 5 |
| 97  | CAfn2                            | 1K85 | 88  | 1.4  | two   | -0.71 | 18 | 0 | 4  | 0  | 1  | 6  | 0  | 2  | 3  | 4  | 0 | 5  | 2  | 1  | 0  | 10 | 20 | 8  | 1 | 3 |
| 98  | N-domain of spore coat protein S | 1PRS | 88  | 3.0  | two   | 0.07  | 8  | 0 | 4  | 5  | 3  | 7  | 0  | 7  | 3  | 6  | 0 | 10 | 6  | 5  | 2  | 5  | 3  | 11 | 0 | 3 |
| 99  | hbLBD                            | 1K8M | 93  | -0.7 | two   | -1.48 | 3  | 1 | 9  | 8  | 2  | 6  | 6  | 7  | 8  | 6  | 1 | 1  | 1  | 4  | 2  | 6  | 5  | 11 | 1 | 5 |
| 100 | Third PDZ domain from PSD-95     | 1TP3 | 93  | 3.0  | multi | 0.11  | 8  | 0 | 4  | 8  | 4  | 13 | 2  | 10 | 3  | 7  | 0 | 4  | 3  | 4  | 7  | 6  | 3  | 5  | 0 | 2 |
| 101 | PDZ2 domain from PTP-BL          | 1GM1 | 94  | 1.0  | multi | -0.98 | 7  | 0 | 4  | 6  | 1  | 14 | 4  | 5  | 7  | 8  | 0 | 3  | 3  | 3  | 4  | 5  | 7  | 12 | 1 | 0 |
| 102 | FRB                              | 1AUE | 95  | 6.0  | multi | 2.01  | 6  | 1 | 3  | 11 | 4  | 6  | 4  | 2  | 5  | 9  | 6 | 3  | 2  | 4  | 8  | 4  | 3  | 5  | 4 | 5 |
| 103 | Death domain                     | 1E41 | 100 | 6.9  | two   | 1.77  | 9  | 3 | 8  | 8  | 1  | 4  | 1  | 4  | 5  | 10 | 1 | 7  | 1  | 6  | 11 | 5  | 4  | 9  | 2 | 1 |
| 104 | P13                              | 1QTU | 117 | -0.4 | two   | 0.69  | 6  | 0 | 8  | 9  | 1  | 7  | 6  | 4  | 1  | 15 | 4 | 2  | 8  | 10 | 10 | 6  | 3  | 9  | 4 | 4 |
| 105 | Myotrophin                       | 2MYO | 118 | 4.8  | multi | 1.61  | 12 | 3 | 11 | 8  | 2  | 10 | 4  | 4  | 12 | 18 | 2 | 4  | 4  | 3  | 2  | 3  | 5  | 7  | 1 | 3 |
| 106 | Hisactophilin                    | 1HCD | 118 | 4.6  | multi | -0.79 | 5  | 1 | 6  | 7  | 5  | 13 | 31 | 6  | 9  | 7  | 1 | 2  | 0  | 1  | 1  | 8  | 6  | 6  | 0 | 3 |
| 107 | RNase-H                          | 3H08 | 146 | 1.9  | multi | 1.67  | 15 | 0 | 6  | 10 | 1  | 12 | 3  | 7  | 14 | 14 | 5 | 10 | 5  | 2  | 7  | 9  | 9  | 6  | 5 | 6 |
| 108 | Apoflavodoxin                    | 3F6R | 148 | 3.5  | multi | 3.30  | 23 | 2 | 10 | 18 | 8  | 14 | 2  | 7  | 6  | 15 | 4 | 5  | 2  | 4  | 3  | 10 | 4  | 8  | 1 | 2 |
| 109 | Staphylococcal nuclease          | 1SNQ | 149 | 2.3  | multi | 0.73  | 14 | 0 | 8  | 12 | 3  | 12 | 3  | 5  | 23 | 12 | 4 | 6  | 4  | 6  | 5  | 5  | 10 | 9  | 1 | 7 |
| 110 | p19INK4d                         | 1BI8 | 166 | 2.2  | multi | 1.46  | 21 | 0 | 12 | 9  | 4  | 15 | 8  | 3  | 3  | 25 | 4 | 3  | 7  | 8  | 12 | 7  | 9  | 16 | 0 | 0 |
| 111 | Apoflavodoxin                    | 1RCF | 169 | 0.8  | two   | -1.57 | 8  | 1 | 20 | 11 | 8  | 19 | 1  | 11 | 10 | 15 | 0 | 8  | 1  | 9  | 4  | 11 | 10 | 10 | 4 | 8 |
| 112 | sIGPS                            | 1IGS | 222 | -7.8 | multi | 0.61  | 11 | 0 | 10 | 27 | 7  | 10 | 0  | 29 | 15 | 25 | 5 | 14 | 7  | 3  | 16 | 19 | 6  | 10 | 0 | 8 |
| 113 | Carbonic anhydrase B1 domain of  | 5A25 | 260 | -4.2 | multi | -0.03 | 17 | 0 | 19 | 11 | 11 | 20 | 11 | 5  | 18 | 26 | 4 | 13 | 19 | 12 | 9  | 16 | 14 | 20 | 7 | 8 |
| 116 | streptococcal protein G          | 3GB1 | 56  | 6.0  | two   | -0.31 | 6  | 0 | 5  | 5  | 2  | 4  | 0  | 1  | 6  | 3  | 1 | 3  | 0  | 1  | 0  | 0  | 11 | 4  | 1 | 3 |
